# Supplementary material for: What are ‘Integrated Landscape Approaches’ and how effectively have they been implemented in the tropics: a systematic map protocol
Source: Springer Nature journal article supplement (doi:10.1186/2047-2382-4-2), 2015-01-01
Supplement: Additional file 3 [file 2047-2382-4-2-s3.pdf]

What are ‘Integrated Landscape Approaches’ and how effectively have they been implemented in the tropics: a systematic map protocol | Environmental Evidence | Full Text


xml version="1.0" encoding="UTF-8"?

Skip to main content

Advertisement

Search


- Explore journals
- Get published
- About BMC
- My account

Search all BMC articles

Search

Environmental Evidence

- Home
- About
- Articles
- Submission Guidelines
- Submit manuscript

What are ‘Integrated Landscape Approaches’ and how effectively have they been implemented in the tropics: a systematic map protocol

Download PDF

Download PDF

- Systematic Review Protocol
- Open access
- Published: 07 January 2015

# What are ‘Integrated Landscape Approaches’ and how effectively have they been implemented in the tropics: a systematic map protocol

- James Reed1,
- Liz Deakin1 &
- Terry Sunderland1

*Environmental Evidence*
**volume 4**, Article number: 2 (2015)
Cite this article

- 29k Accesses
- 73 Citations
- 35 Altmetric
- Metrics details

## Abstract

### Background

There is an increasing acceptance that sectorial approaches to land management are no longer sufficient to meet global challenges such as poverty alleviation, biodiversity conservation, and food production. The pressing challenge of integrated landscape management is to link agricultural practices, institutions and policies with other landscape-scale activities. “Integrated Landscape Approaches” provide a basic framework for balancing competing demands and integrating policies for multiple land uses within a given area. However, attempts to formalize and characterize what landscape approaches actually represent have resulted in a plethora of interlinked terminology and re-invention of ideas and practices under multiple guises. This has led to delayed uptake amongst policy makers and resistance to implementation on the ground. This protocol will describe the methodology to be employed for a systematic map that will chart the development of the landscape approach theory, consolidate and synthesize existing definitions, and identify where and how these approaches have been implemented in the humid and dry tropics.

### Methods/Design

A scoping exercise gave rise to a selection of search terms appropriate to the research question which will then be applied to a suite of specialist, online and institutional databases. The protocol will follow a population-intervention-comparator-outcome (P.I.C.O) framework which provides the basic rationale for evidence-based systematic literature searches. The P.I.C.O serves as the inclusion criteria and together with a pre-determined exclusion criteria will be used to screen retrieved literature for relevance at title, abstract and full text levels. All studies investigating either landscape approach theory or implementation within the humid and dry tropics will be included. The resulting studies will be coded and used to satisfy two key outcomes. First, literature on the theory of landscape-scale approaches will be compared and contrasted to identify where overlap and disjuncture exists. Second, studies of landscape approach implementation will be assessed for effectiveness, geographically mapped, made available in searchable databases and supplemented with a full report.

## Background

Food security, poverty alleviation, climate change, and biodiversity loss are global challenges that have been at the forefront of international agendas during the last decade [1]. However, conventional post-war sectorial approaches to food production, conservation and development initiatives alone are no longer seen as viable, sustainable strategies to address these often inter-connected issues [2–4]. An alternative approach that involves ‘joined-up’ thinking between multiple stakeholders to best manage multiple land uses at a landscape scale has been developed in various forms over recent decades, yet its definition and implementation remain elusive.

A Landscape Approach is broadly defined as a framework to integrate policy and practice for multiple land uses, within a given area, to ensure equitable and sustainable use of land while strengthening measures to mitigate and adapt to climate change [5–8]. It also aims to balance competing demands on land through the implementation of adaptive and integrated management systems. These include not only the physical characteristic features of the landscape itself, but all of the internal and external socio-economic and socio-political drivers that affect land use, particularly related to conservation, forestry and agriculture [7]. In short, landscape approaches seek to address the increasingly complex and widespread environmental, social and political challenges that transcend traditional management boundaries.

Landscape approaches are primarily rooted in conservation and the science of landscape ecology [9, 10]. Biodiversity conservation in particular has been addressed in a “landscape context” since the early 1980s [11], and early conservation theory promoted landscape-scale thinking through the principles of island biogeography [12]. The expanded focus of conservation implementation from protected areas to wider social issues led to the design of “integrated development and conservation projects” (ICDPs) that attempted to integrate protected area management with local societal needs and aspirations, often with disappointing outcomes for both conservation and development [13]. ICDP’s were regarded as being too localized in focus and heavily biased towards achieving conservation targets, rather than those of economic development [14], and did not take into account the inherent trade-offs between the two [15].

Thus we have seen the development of a variety of landscape frameworks by multiple actors, with the aim of embedding single-sector conservation, agricultural production and other land uses within broader landscape scale management strategies. Foremost amongst these is the “Ecosystem Approach” of the Convention on Biological Diversity, as well as a plethora of landscape-scale initiatives developed by the majority of conservation NGO’s. Equally, landscape scale interventions have been embraced across a variety of sectors, for example Integrated Rural Development, Integrated Natural Resource Management, Integrated Watershed Management, and Integrated Floodplain Management to name just a few. As developments in landscape scale management strategies continue to emerge, the sheer volume of approaches proposed by numerous research and practitioner organizations has resulted in a rich, yet confusing terminology that may be inhibiting progress. Organizations are often referring to the same concept and are either unknowingly using different terminology to others or choosing to label their approach differently. This has arguably led to fragmentation of knowledge, unnecessary re-invention of ideas and practices, and slow progress in gaining policy traction [16].

The UN Sustainable Development Goals (SDG), which will supersede the Millennium Development Goals, are due to be finalized in 2015. The current draft calls for ‘holistic and integrated approaches to sustainable development that restore the health and integrity of the Earth’s ecosystem’ – sentiments that resound strongly with those that endorse landscape approaches to land management. Given that at least five of the key objectives of the SDG’s (end hunger; secure water; promote strong, inclusive and sustainable economic growth; tackle climate change; protect and promote terrestrial resources) display clear overlap with landscape approach desired outputs, there is a timely need to synthesize the current evidence base on landscape approaches. As noted in a recent review, a universal definition for a ‘landscape approach’ remains elusive [7]. This confusion over terminology often stems from landscapes being defined in different ways [7]. A ‘landscape’ can refer to either spatial and ecological characteristics that help define conservation and development targets, or it can refer to governance and other social interactions and mechanisms that minimize conservation and development tradeoffs [17]. Consequently, despite such a surfeit of approaches, researchers and practitioners are still questioning what the landscape approach actually is, while its application and practicality are also questioned as a result of the complexity of the associated concepts [18].

### Objectives of the systematic map

This systematic map therefore attempts to shed some light on these questions by:

- conceptually mapping the development of landscape approaches;
- consolidating and synthesizing existing definitions and conceptual frameworks of landscape-scale approaches to land management;
- synthesizing the current literature to identify where and how effectively landscape approaches have been implemented in practice.
- geographically mapping where and how landscape approaches have been implemented in the dry and humid tropics.

The authors acknowledge that this systematic mapping process cannot uncover all of the evidence related to integrated landscape approaches to land management as many current examples are a result of trial and error approaches at the local level. However, we understand this mapping to be the first attempt to aggregate the existing published scientific knowledge on the subject. As such, this review can complement local knowledge and other reviews which engage directly with practitioners on the ground [19, 20]. Ultimately, it is anticipated this process will help inform the development of a clear strategy on landscape-scale management, contribute to the integration of conservation, agriculture and other land uses into future land use policies and identify how landscape approaches can be best implemented to support the forthcoming Sustainable Development Goals.

#### Primary review question

The primary question of this systematic map will be:

*What are landscape approaches, and how effectively have they been implemented in the tropics?*

The secondary question of this systematic map will be:

*What the characteristics of, and where are, landscape approaches being implemented?*

This review will take the form of a systematic map, cataloguing the existing evidence across a wide range of variables such as setting, methodology, scale and measured outcomes. The map database will catalogue the definition, purpose and location of relevant frameworks representative of landscape approaches in tropical regions. We anticipate that this will provide a vital resource for researchers, practitioners and decision-makers by:

- Synthesizing the currently fragmented literature base on landscape approaches
- Identifying where knowledge or research gaps exist
- Acting as a base for the development of future landscape approach research
- Providing a resource for the implementation of future landscape approach initiatives
- Deciphering current terminology applicable to landscape approaches

An interactive geographical map will also be produced highlighting the locations of where landscape approaches have been/are being implemented in the tropics. This map will allow users to explore geographically (by location) or thematically (by primary resource interest of the project) and provide a brief synopsis of the project and a link to the publication. Finally, stakeholder consultation, the author group’s prior knowledge, and screening of the literature will identify key conceptual frameworks for landscape approaches produced in recent decades. These will be formatted in a web diagram in order to highlight overlaps and disjuncture, particularly with reference to terminology applied. This process will contribute to efforts aimed at disentangling the proliferation of terms in use and provide greater clarity.

The map will follow a population-intervention-comparator-outcome (P.I.C.O) framework which provides the basic rationale for evidence-based systematic literature searches [21]. In order to be retained at each stage of the literature screening, studies will have to conform to the following inclusion (P.I.C.O) and exclusion criteria:

### Population

Landscapes of the humid and dry tropics.

### Intervention/exposure

Frameworks/strategies characteristic of landscape approaches for integrating agriculture, forestry and other land uses. While it is difficult to specify *a priori* criteria for inclusion, some minimum requirements would be that the intervention aims to balance competing sectorial (i.e. agriculture, conservation, forestry, private etc.) or stakeholder demands on land and that the scale of the project is therefore beyond a single land use unit.

### Comparator

Lack of integrated land management strategy in proximate regions (spatial comparator), or before-during-after longitudinal comparison within integrated landscape sites (temporal comparator).

### Outcome

Documented positive or negative evidence of landscape approaches in practice on social, agronomic, environmental or economic outcomes.

#### Exclusion criteria

- Non-English studies
- Studies that fall outside the geographic scope of the map (the humid and dry tropics)
- Prior review papers will not be included, but the bibliographies of such papers will be screened for primary source material of relevance. Theoretical papers will, however, be included as they will help to document how landscape approach theory has developed.

## Methods

### Searches

A preliminary scoping was conducted in May 2014 using Google Scholar [22]. This scoping exercise was designed to 1. Aid the evolution of the final search terms; 2. Contribute to the framing of the research questions; and 3. Identify potential outputs of the systematic map. Following consultation within the author group and between other recognized experts in the field at a stakeholder workshop organized as a side event at the Landscapes for People Food and Nature in Africa congress in Nairobi (July 3rd 2014), a preliminary selection of terms were established. A secondary scoping exercise was performed in August 2014 using Web of Science (WoS) [23], designed to test the appropriateness of the selected terms. It was found that the original terms were capturing an unwieldy number of publications, many of which were far outside the relevance of the topic. The search terms were accordingly revised, re-formatted and re-trialed a number of times before consensus was achieved within the research team that a selection of terms that were both inclusive and specific, appropriate to the research question, had been achieved (the details of this scoping exercise are attached as an Additional file 1).

These terms (formatted as below) generated 10,045 ‘hits’ in the scoping exercise using WoS [23] and by using the functions to refine the search by author and relevance we were able to test the appropriateness of the search against a pre-determined selection of publications acknowledged as particularly relevant to the research question (see Additional file 2).

((“Landscape Approach” OR “Integrated Landscape Management” OR “Landscape Configuration” OR “Landscape Ecology”) **AND** (“Multifunctional Landscapes” OR “Land Use Change” OR “Landscape Matrix” OR “Landscape Mosaic” OR “Land sharing” OR “Land sparing” OR “Production Landscapes”) **AND** (“Sustainable Agriculture” OR “Agricultural Management Practices” OR “Agro-ecology” OR “Agro-ecosystem Management” OR “Ecoagriculture” OR “Climate-Smart Agriculture” OR “Evergreen Agriculture” OR “Food Security” OR “Forest-agriculture Nexus” OR “Sustainable Intensification” OR “Sustainability Science” OR “sustainable use reserves” OR “agroforestry”) **OR** (“Environment and Development Reconciliation” OR “Biodiversity Conservation” OR “Ecosystem Approach” OR “Ecosystem Based Adaptation” OR “Environmental Sustainability” OR “Integrated Conservation and Development” OR “Integrated Development Approaches” OR “Integrated Natural Resource Management” OR “Integrated Watershed Management” OR “Landscape Connectivity” OR “Agriculture Environment Trade Offs”)).

Where possible the search terms will be applied in this format, however we are aware that database functionality is not universal and we will therefore amend the amount of terms or use of Boolean operators where necessary. Any such changes will be documented and reported in the map.

### Publication database searches

Searches will be conducted through:-

a. Specialist peer-reviewed publication databases

The following databases were selected in order to best capture a broad spectrum of both the natural and social science literature base:

Web of Science (WoS) [23]

CAB Abstracts [24]

Scopus [25]

PubMed [26]

b. Individual journals

The following sources were identified as being able to offer a platform to capture regionally specific or further freely accessible literature:

International Network for the Availability of Scientific Publications (INASP) [27]

Directory of Open Access Journals (DOAJ) [28]

African Journals Online (AJOL) [29]

Asia Journals Online (AsiaJOL) [30]

c. Internet searches

Web searches will be conducted in Google Scholar [22] and Microsoft Academic Search [31] to test the comprehensiveness of the database searches.

The first 100 returned hits will be compared with those already retrieved. Any additional literature, not previously captured will be added to the reference list.

### Specialist and supplementary searches

Grey literature (unpublished or non-peer-reviewed articles) will be sought via a number of channels. First, appropriate research organizations (see list below) will be contacted and invited to contribute any relevant material. Second, the websites of these organizations will be screened. Third, expert workshops were held to request any further publications relevant to the subject, the first in conjunction with the Landscapes for People, Food and Nature conference (July 1–3, 2014) and a second at the James Cook University (JCU) workshop on landscape approaches at Cape Tribulation (July 18–20, 2014). Fourth, a call for grey literature (an example is attached as an Additional file 3) will be posted on the CIFOR website and widely distributed in blog posts and other appropriate social media channels. Finally, relevant list serves will be identified and a call for grey literature will be submitted and distributed.

### Research organizations to be contacted for literature

- Center for International Forestry Research (CIFOR) [32]
- Commonwealth Forestry Association (CFA) [33]
- EcoAgriculture Partners [34]
- Fauna and Flora International (FFI) [35]
- Food and Agriculture Organization of the United Nations (FAO) [36]
- Food, Agriculture and Natural Resources Policy Analysis Network (FANRPAN) [37]
- Global Partnership for Forest and Landscape Restoration (GPFLR) [38]
- Globally Important Agricultural Heritage Systems (GIAHS) [39]
- International Institute for Environment and Development (IIED) [40]
- International Institute for Sustainable Development (IISD) [41]
- International Model Forest Network (IMFN) [42]
- International Union for Conservation of Nature (IUCN) [43]
- International Union of Forest Research Organizations (IUFRO) [44]
- Platform for Agrobiodiversity Research (PAR) [45]
- Terrafrica [46]
- The Consultative Group on International Agriculture Research (CGIAR) [47]
- The Nature Conservancy (TNC) [48]
- The World Bank’s Program on Forests (PROFOR) [49]
- United Nations Educational, Scientific and Cultural Organization (UNESCO) [50]
- United Nations Environment Program–World Conservation Monitoring Centre (UNEP-WCMC) [51]
- Wageningen University [52]
- World Agroforestry Centre (ICRAF) [53]
- World Conservation Society (WCS) [54]
- World Environment Library [55]
- World Resources Institute (WRI) [56]
- World Wildlife Fund (WWF) [57]
- Zoological Society of London (ZSL) [58]

### Search strategy and screening process

Due to time and resource constraints, searches will be performed in English language only. Any non-English material identified will be assigned a separate Mendeley [59] library and be made available on request. The principal search terms are ‘landscape approach’, ‘multifunctional landscapes’, ‘sustainable agriculture’ and ‘environment and development reconciliation’. The geographic scope for this map will be the humid and dry tropics. It is acknowledged that land management at a landscape scale has been practiced for centuries but due to the temporal and spatial limitations of this map, we will refine our search to literature from post-1975.

Each search record from the respective databases and search engines will be assigned a separate Mendeley [59] library to clearly document each stage of the search strategy. These libraries will then be combined to remove duplicates and a systematic screening process using a pre-defined inclusion/exclusion criteria (see Objectives section above) will be applied.

Two researchers will work independently applying the inclusion/exclusion criteria through three sequential stages (see Figure one [21]) in order to sort for relevance, assess study quality and generate data collection. Prior to screening, the two researchers will perform a Kappa analysis at title and abstract level on a random subset of 100 articles identified in the scoping process to test consistency and objectivity between reviewers [60, 61]. In the event of the score being below 0.6, the reviewers will discuss discrepancies and repeat the Kappa process. Any significant disagreements will be discussed until consensus is reached or assessed by a third reviewer.

At the first stage of screening, researchers will review the article titles of all returned ‘hits’. Those that conform to the inclusion/exclusion criteria will pass through to the next stage, while those that do not will be removed. If there is any doubt, the article will be retained. The same process will then be followed for the following two stages, firstly reviewing by abstract and finally reviewing by full-text. Full-text assessment is dependent on the ability to generate the complete document. Every effort will be made and in the event of being unable to source the full text, a record of unavailable studies will be provided as an annex in the full map. This final stage of review will also incorporate a study quality assessment and data extraction process (see below). Any studies eliminated at the full-text stage will be documented with a record of why they were categorized as not relevant.

### Study quality assessment

A basic checklist of quality criteria adapted from previous systematic maps [21, 62], has been developed against which studies will be assessed. For inclusion for synthesis, studies must demonstrate:

- Clear aims
- Clear and repeatable methodology
- Evidence of integrating at least 2 land uses
- Evidence of integrating at least 2 stakeholders
- Outcomes that are measured accurately and reliably
- Findings reported consistently with the methodology employed and the empirical data provided

Studies will be ranked high to low dependent on the number of criteria they fulfill from the above list. This criteria will be tested on key known references and may be further developed during consultation with recognized experts and as the data extraction process is performed. Studies which fail to meet any of criteria will be eliminated from the map but retained within an additional file.

### Map coding

Retrieved studies will be catalogued by recording the key bibliographic information detailed below and exported to an excel file.

- Title
- Author(s)
- Journal
- Date of publication
- Location of study
- Scope of study (extent of landscape scale if given)
- Terminology applied and definition (e.g. Landscape approach, integrated management etc.)
- Methodology employed (e.g. experimental, research station trials, RCTs, farmer fields, remote sensing/GIS, participatory trials, household surveys, community workshops etc.)
- Type of data (i.e. primary, review or meta-analysis)
- Type of food production system(s) incorporated (e.g. home garden, coffee agroforestry, large scale grain production, etc.)
- Documentation of competing land uses by sector (e.g. forestry, agriculture, mining etc.)
- Level of private sector involvement
- Type of landscape (e.g. forest fragments, degraded forests, swidden landscapes, pastoral systems, etc.)
- Type of outcome (i.e. yield, conservation target, livelihood indicators, other). It is not an objective to identify outcomes of success/failure as it is anticipated that as long-term initiatives, many landscape approaches will be still be ongoing. However, if results are documented (for example short-term objectives achieved), they will be extracted for the map (results here will be dependent on the studies identified but it is anticipated these will include both livelihood and environmental variables, amongst others).
- Other effect modifiers (e.g. impact of variables other than those studied)

### Data mapping

Two data mapping processes will be performed, one each for the conceptual and research elements of the map. Conceptual frameworks for landscape approaches will be mapped in a web diagram that will enable simple visual comparison of the various approaches, highlighting where overlap or disjuncture occurs. For the research element, a geographical interactive map will be produced which will allow users to search geographically or thematically. This map will detail where, how and over what time period landscape approaches are being implemented. Results (measure of success) will be included when possible (e.g. where short term objectives have been achieved) or when appropriate. However, we acknowledge that landscape approaches are often long-term, and on-going initiatives; as such an ‘end result’ is not a measure we set out to identify.

In addition to the maps produced, all data will be formatted in a searchable database (see below) summarizing study characteristics and quality. The entire process will then be synthesized within a detailed peer-reviewed systematic map report.

### Systematic map database

The literature captured during the systematic mapping process will be recorded in a freely accessible, searchable database. This library will contain literature related to implementation of landscape approaches and will fully detail the nature and location of the studies. By identifying key knowledge gaps, we anticipate this database will provide a useful resource for future research. The database can also provide a base or starting point for further synthesis of the literature within a full systematic review.

## References

1. Laurance WF, Sayer J, Cassman KG: **Agricultural expansion and its impacts on tropical nature.**
   *Trends Ecol Evol* 2014, **29:**107–116. 10.1016/j.tree.2013.12.001

   Article 
   Google Scholar
2. Godfray HCJ, Beddington JR, Crute IR, Haddad L, Lawrence D, Muir JF, Pretty J, Robinson S, Thomas SM, Toulmin C: **Food security: the challenge of feeding 9 billion people.**
   *Science* 2010, **327:**812–818. 10.1126/science.1185383

   Article 
   CAS 
   Google Scholar
3. Foley JA, Ramankutty N, Brauman KA, Cassidy ES, Gerber JS, Johnston M, Mueller ND, O’Connell C, Ray DK, West PC, Balzer C, Bennett EM, Carpenter SR, Hill J, Monfreda C, Polasky S, Rockström J, Sheehan J, Siebert S, Tilman D, Zaks DPM: **Solutions for a cultivated planet.**
   *Nature* 2011, **478:**337–342. 10.1038/nature10452

   Article 
   CAS 
   Google Scholar
4. Tscharntke T, Clough Y, Wanger TC, Jackson L, Motzke I, Perfecto I, Vandermeer J, Whitbread A: **Global food security, biodiversity conservation and the future of agricultural intensification.**
   *Biol Conserv* 2012, **151:**53–59. 10.1016/j.biocon.2012.01.068

   Article 
   Google Scholar
5. Milder JC, Buck LE, DeClerck FAJ, Scherr SJ: **Landscape Approaches to Achieving Food Production, Natural Resource Conservation, and the Millenium Development Goals.** In *Integrating Ecology and Poverty Reduction*. Edited by: Ingram JC, DeClerck FAJ, Rumbaitis Del Rio C. New York, NY: Springer; 2010:77–108.

   Google Scholar
6. Scherr SJ, Shames S, Friedman R: **From climate-smart agriculture to climate-smart landscapes.**
   *Agric Food Secur* 2012, **1:**12. 10.1186/2048-7010-1-12

   Article 
   Google Scholar
7. Sayer J, Sunderland T, Ghazoul J, Pfund J-L, Sheil D, Meijaard E, Venter M, Boedhihartono AK, Day M, Garcia C, Van Oosten C, Buck LE: **Ten principles for a landscape approach to reconciling agriculture, conservation, and other competing land uses.**
   *Proc Natl Acad Sci U S A* 2013, **110:**8349–8356. 10.1073/pnas.1210595110

   Article 
   CAS 
   Google Scholar
8. Harvey C a, Chacón M, Donatti CI, Garen E, Hannah L, Andrade A, Bede L, Brown D, Calle A, Chará J, Clement C, Gray E, Hoang MH, Minang P, Rodríguez AM, Seeberg-Elverfeldt C, Semroc B, Shames S, Smukler S, Somarriba E, Torquebiau E, Van Etten J, Wollenberg E: **Climate-smart landscapes: opportunities and challenges for integrating adaptation and mitigation in tropical agriculture.**
   *Conserv Lett* 2014, **7:**77–90. 10.1111/conl.12066

   Article 
   Google Scholar
9. Lindenmayer D, Hobbs RJ, Montague-Drake R, Alexandra J, Bennett A, Burgman M, Cale P, Calhoun A, Cramer V, Cullen P, Driscoll D, Fahrig L, Fischer J, Franklin J, Haila Y, Hunter M, Gibbons P, Lake S, Luck G, MacGregor C, McIntyre S, Nally RM, Manning A, Miller J, Mooney H, Noss R, Possingham H, Saunders D, Schmiegelow F, Scott M, *et al*.: **A checklist for ecological management of landscapes for conservation.**
   *Ecol Lett* 2008, **11:**78–91.

   Google Scholar
10. Sayer J: **Reconciling conservation and development: are landscapes the answer?**
    *Biotropica* 2009, **41:**649–652. 10.1111/j.1744-7429.2009.00575.x

    Article 
    Google Scholar
11. Noss RF: **A regional landscape approach to maintain diversity.**
    *Bioscience* 1983, **33:**700–706. 10.2307/1309350

    Article 
    Google Scholar
12. Kingsland SE: **Creating a science of nature reserve design: perspectives from history.**
    *Environ Model Assess* 2002, **7:**61–69. 10.1023/A:1015633830223

    Article 
    Google Scholar
13. Wells MP, McShane TO: **Integrating protected area management with local needs and aspirations.**
    *AMBIO A J Hum Environ* 2004, **33:**513–519.

    Google Scholar
14. McShane TO, Hirsch PD, Trung TC, Songorwa AN, Kinzig A, Monteferri B, Mutekanga D, Van Thang H, Dammert JL, Pulgar-Vidal M, Welch-Devine M, Peter Brosius J, Coppolillo P, O’Connor S: **Hard choices: making trade-offs between biodiversity conservation and human well-being.**
    *Biol Conserv* 2011, **144:**966–972. 10.1016/j.biocon.2010.04.038

    Article 
    Google Scholar
15. Sunderland TCH, Ehringhaus C, Campbell BM: **Conservation and development in tropical forest landscapes: a time to face the trade-offs?**
    *Environ Conserv* 2008, **34:**276–279.

    Google Scholar
16. Scherr SJ, Shames S, Friedman R: *Defining Integrated Landscape Management for Policy Makers*. Washington, DC: Ecoagriculture Policy Focus No. 10; 2013.

    Google Scholar
17. Redford KH, Coppolillo P, Sanderson EW, Fonseca DGAB, Dinerstein E, Groves C, Mace G, Maginnis S, Mittermeier RA, Noss R, Olson D, Robinson JG, Vedder A, Wright M: **Mapping the conservation landscape.**
    *Conserv Biol* 2003, **17:**116–131. 10.1046/j.1523-1739.2003.01467.x

    Article 
    Google Scholar
18. Pfund J-L: **Landscape-scale research for conservation and development in the tropics: fighting persisting challenges.**
    *Curr Opin Environ Sustain* 2010, **2:**117–126. 10.1016/j.cosust.2010.03.002

    Article 
    Google Scholar
19. Estrada-Carmona N, Hart AK, DeClerck FAJ, Harvey CA, Milder JC: **Integrated landscape management for agriculture, rural livelihoods, and ecosystem conservation: an assessment of experience from Latin America and the Caribbean.**
    *Landsc Urban Plan* 2014, **129:**1–11.

    Article 
    Google Scholar
20. Milder JC, Hart AK, Dobie P, Minai J, Zaleski C: **Integrated landscape initiatives for African agriculture, development, and conservation: a region-wide assessment.**
    *World Dev* 2014, **54:**68–80.

    Article 
    Google Scholar
21. Roberts PD, Diaz-Soltero H, Hemming DJ, Parr MJ, Wakefield NH, Wright HJ: **What is the evidence that invasive species are a significant contributor to the decline or loss of threatened species? A systematic review map.**
    *Environ Evid* 2013, **2:**5. 10.1186/2047-2382-2-5

    Article 
    Google Scholar
22. **Google Scholar** [http://scholar.google.com/]
23. **Web of Science Thomson Reuters** [http://thomsonreuters.com/thomson-reuters-web-of-science/]
24. **CAB Abstracts** [http://www.cabi.org/publishing-products/online-information-resources/cab-abstracts/]
25. **Scopus - Document search** [http://www.scopus.com/]
26. **Home - PubMed - NCBI** [http://www.ncbi.nlm.nih.gov/pubmed]
27. **INASP - Home** [http://www.inasp.info/]
28. **Directory of Open Access Journals** [http://doaj.org/]
29. **African Journals Online (AJOL)** [http://www.ajol.info/]
30. **Asia Journals Online** [http://www.asiajol.info/]
31. **Microsoft Academic Search** [http://academic.research.microsoft.com/]
32. **Center for International Forestry Research - CIFOR** [http://www.cifor.org/]
33. **Commowealth Forestry Association** [http://cfa.juice-e.co.uk/forestscienceinfo.html]
34. **Ecoagriculture Partners** [http://www.ecoagriculture.org/]
35. **Fauna & Flora International** [http://www.fauna-flora.org/]
36. **Food and Agriculture Organization of the United Nations** [http://www.fao.org/home/en/]
37. **FANRPAN - Home** [http://www.fanrpan.org/]
38. **GPFLR Global Partnership for Forest and Landscape Restoration** [http://www.forestlandscaperestoration.org/]
39. **GIAHSGlobally Important Agricultural Heritage Systems** [http://www.fao.org/giahs/en/]
40. **International Institute for Environment and Development Linking local priorities and global challenges** [http://www.iied.org/]
41. **IISD International Institute for Sustainable Development** [http://www.iisd.org/]
42. **IMFN International Model Forest Network** [http://www.imfn.net/]
43. **IUCN - International Union for Conservation of Nature** [http://www.iucn.org/]
44. **IUFRO – International Union of Forest Research Organizations** [http://www.iufro.org/iufro/]
45. **PAR - Platform for Agrobiodiversity Research** [http://agrobiodiversityplatform.org/]
46. **Terrafrica** [http://www.terrafrica.org/]
47. **CGIAR The Consultative Group on International Agriculture Research** [http://www.cgiar.org/]
48. **Nature Conservancy Protecting Nature, Preserving Life** [http://www.nature.org/]
49. **PROFOR Program on Forests** [http://www.profor.info/]
50. **UNESCO United Nations Educational, Scientific and Cultural Organization** [http://en.unesco.org/]
51. **UNEP-WCMC United Nations Environment Program–World Conservation Monitoring Centre** [http://www.unep-wcmc.org/]
52. **Wageningen UR** [http://www.wageningenur.nl/en.htm]
53. **World Agroforestry Centre ICRAF** [http://www.worldagroforestry.org/]
54. **WCS - Wildlife Conservation Society** [http://www.wcs.org/]
55. **World Environment Library** [http://www.nzdl.org/gsdlmod?a=p&p=about&c=envl]
56. **World Resources Institute** [http://www.wri.org/]
57. **WWF - World Wildlife Fund** [http://www.wwf.org/]
58. **Zoological Society of London (ZSL) - UK Zoos & Animal Conservation** [http://www.zsl.org/]
59. **Dashboard Mendeley** [http://www.mendeley.com/dashboard/]
60. Cohen J: **A Coefficient of Agreement for Nominal Scales.**
    *Educ Psychol Meas* 1960, **20:**37–46. 10.1177/001316446002000104

    Article 
    Google Scholar
61. Edwards P, Clarke M, DiGuiseppi C, Pratap S, Roberts I, Wentz R: **Identification of randomized controlled trials in systematic reviews: accuracy and reliability of screening records.**
    *Stat Med* 2002, **21:**1635–1640. 10.1002/sim.1190

    Article 
    Google Scholar
62. Roe D, Day M, Booker F, Zhou W, Allebone-Webb S, Kümpel N, Hill N a O, Wright J, Rust N, Sunderland TC, Redford K, Petrokofsky G: **Are alternative livelihood projects effective at reducing local threats to specified elements of biodiversity and/or improving or maintaining the conservation status of those elements?: a systematic review protocol.**
    *Environ Evid* 2014, **3:**6. 10.1186/2047-2382-3-6

    Article 
    Google Scholar

Download references

## Acknowledgements

The authors would like to thank all participants in the two workshops mentioned above (LPFN Nairobi, JCU, Cape Tribulation). We also thank Gillian Petrokofsky and Jessica Clendenning for inputs on methodology. Funding support for this project came via the Evidence Based Forestry (EBF) Initiative, which is funded by a grant to CIFOR from the UK’s Department for International Development (DfID).

## Author information

### Authors and Affiliations

1. Center for International Forestry Research (CIFOR), Jalan CIFOR, Situ Gede, Sindang Barang, Bogor, 16115, Indonesia

   James Reed, Liz Deakin & Terry Sunderland

Authors

1. James Reed

   View author publications

   You can also search for this author in
   PubMed Google Scholar
2. Liz Deakin

   View author publications

   You can also search for this author in
   PubMed Google Scholar
3. Terry Sunderland

   View author publications

   You can also search for this author in
   PubMed Google Scholar

### Corresponding author

Correspondence to
James Reed.

## Additional information

### Competing interests

The authors declare that they have no competing interests.

### Authors’ contributions

JR, LD & TS co-drafted the manuscript. JR & LD developed the search strategy and data extraction strategy. JR & LD will coordinate the review. All authors read and approved the final manuscript.

## Electronic supplementary material

### 13750\_2014\_53\_MOESM1\_ESM.docx

Additional file 1:
**Evolution of search terms for systematic map on Landscape Approaches Scoping exercise using Web of Science.**
(DOCX 17 KB)

### Additional file 2: **Key Text List for LA SM.** (DOCX 12 KB)

### 13750\_2014\_53\_MOESM3\_ESM.pdf

Additional file 3:
**A call for grey literature: ‘Landscape Approaches’ in humid and dry tropics.** A systematic review map. (PDF 270 KB)

## Rights and permissions

This article is published under license to BioMed Central Ltd. This is an Open Access article distributed under the terms of the Creative Commons Attribution License (http://creativecommons.org/licenses/by/4.0), which permits unrestricted use, distribution, and reproduction in any medium, provided the original work is properly credited. The Creative Commons Public Domain Dedication waiver (http://creativecommons.org/publicdomain/zero/1.0/) applies to the data made available in this article, unless otherwise stated.

Reprints and permissions

## About this article

### Cite this article

Reed, J., Deakin, L. & Sunderland, T. What are ‘Integrated Landscape Approaches’ and how effectively have they been implemented in the tropics: a systematic map protocol.
*Environ Evid* **4**, 2 (2015). https://doi.org/10.1186/2047-2382-4-2

Download citation

- Received: 02 September 2014
- Accepted: 18 November 2014
- Published: 07 January 2015
- DOI: https://doi.org/10.1186/2047-2382-4-2

### Share this article

Anyone you share the following link with will be able to read this content:

Get shareable link

Sorry, a shareable link is not currently available for this article.

Copy to clipboard

Provided by the Springer Nature SharedIt content-sharing initiative

### Keywords

- Landscape approach
- Multifunctional landscapes
- Integrated landscape approach
- Production landscapes
- Food security
- Agriculture environment trade-offs
- Conservation and development
- Systematic map

Download PDF

Advertisement

#### Environmental Evidence

ISSN: 2047-2382

#### Contact us

- Submission enquiries: Access here and click Contact Us
- General enquiries: info@biomedcentral.com

- Read more on our blogs
- Receive BMC newsletters
- Manage article alerts
- Language editing for authors
- Scientific editing for authors

- Policies
- Accessibility
- Press center

- Support and Contact
- Leave feedback
- Careers

### Follow BMC

- BMC Twitter page
- BMC Facebook page
- BMC Weibo page

By using this website, you agree to our
Terms and Conditions,
Your US state privacy rights,
Privacy
statement and
Cookies policy.
Your privacy choices/Manage cookies we use in the preference centre.

© 2024 BioMed Central Ltd unless otherwise stated. Part of
Springer Nature.

xml version="1.0" encoding="UTF-8"?
